# Supplementary material
Source: PubMed Central journal article supplement (PMC9930306)

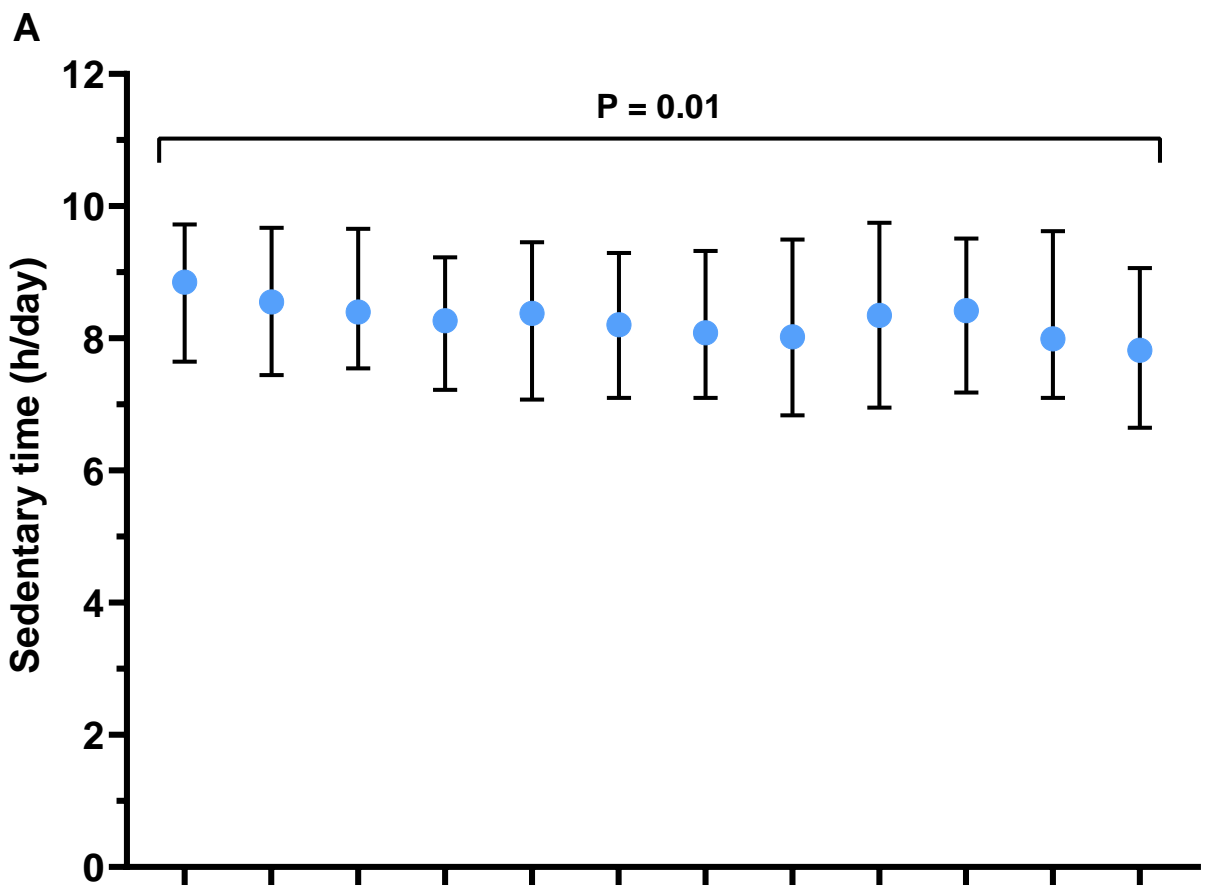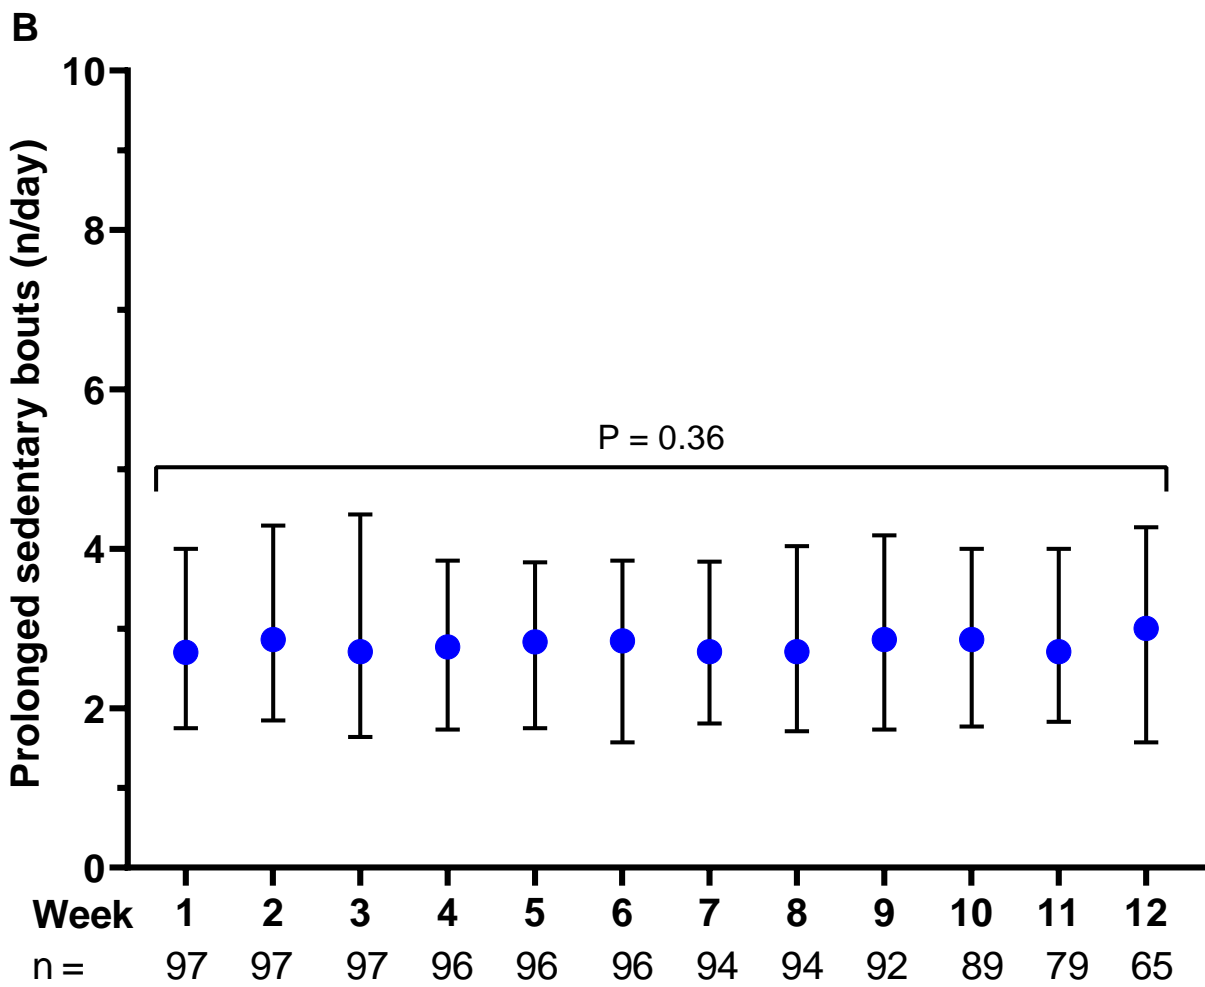

Supplement: 12966_2023_1419_MOESM2_ESM.pdf [file 12966_2023_1419_MOESM2_ESM.pdf]
